# Supplementary material for: Facilely controllable synthesis of copper-benzothiadiazole complexes via solvothermal reactions: exploring the customized synthetic approach by experiments
Source: Royal Society of Chemistry journal article supplement (doi:10.1039/d0dt03817b), 2021-01-01
Supplement: d0dt03817b1.pdf [file d0dt03817b1.pdf]

## Supporting Information

# Facilely controllable synthesis of copper-benzothiadiazole complexes via solvothermal reactions: exploring the customized synthetic approach by experiments

Chen Hu,<sup>†,‡</sup> Yingnan Zhao,<sup>†,‡</sup> Xiao Han,<sup>‡</sup> Jiaqi Song,<sup>†</sup> Jie Ding,<sup>\*,†</sup> Hongwei Hou<sup>\*,†</sup>

<sup>†</sup>Green Catalysis Center, College of Chemistry, Zhengzhou University, Henan 450001, China.

<sup>‡</sup>College of Chemical Engineering & Material, Handan University, Hebei, 056005, China.

E-mail: [jieding@zzu.edu.cn](mailto:jieding@zzu.edu.cn); E-mail: [houhongw@zzu.edu.cn](mailto:huhongw@zzu.edu.cn).

## Experimental Details

**Materials.** All chemical reagents were purchased from commercial suppliers without further purification.), the synthetic procedure of **L1** is according to the literature.<sup>1</sup>

**Physical Measurements.** The FT-IR spectra were recorded in the range of 400–4000  $\text{cm}^{-1}$  on a Bruker Tensor 27 spectrophotometer from KBr pellets. The elemental analyses were performed with FLASH EA 1112 elemental analyzer. Powder X-ray diffraction (PXRD) patterns were recorded on Cu  $K\alpha_1$  radiation on a PANalyticalX'Pert PRO diffractometer. Thermal analyses were carried out on a Netzsch STA 449C thermal analyzer at a heating rate of 10  $^{\circ}\text{C min}^{-1}$  in air. UV-Vis absorption spectra were obtained from a JASCO FP-8300 UV/Vis Spectrophotometer at room temperature. The measurements of steady-state emission spectra were conducted on a JASCO FP-8300 fluorescence spectrophotometer at room temperature. The emission lifetime were detected with a photoluminescence quantum yield measurement system (Edinburgh Instruments Ltd FLS980 Fluorescence Spectrometer, the fluorescence lifetime measurement range is 100 ps ~ 50  $\mu\text{s}$ .) at room temperature. The results from the PXRD patterns are in close agreement with that calculated from the single-crystal structure determination. Due to the TGA result, there was no solvent molecules in **C2** and **C3**. Hence,  $\text{N}_2$  gas sorption experiments of coordination polymers **C2** and **C3** were tested without the solvent-removing treatments, which were collected on a Micromeritics 3Flex surface area and pore size analyzer under ultrahigh vacuum in a clean system, with a diaphragm and turbo pumping system. Ultrahigh-purity-grade (> 99.999%)  $\text{N}_2$  gas was applied in all adsorption

measurements. The experimental temperature was maintained by liquid nitrogen (77 K).

Crystal structure of **C1-C5** determination by X-ray diffraction was performed on Bruker D8 VENTURE with the X-ray source (Mo-K $\alpha$  radiation,  $\lambda = 0.71073 \text{ \AA}$ ) at temperature of 295 K. Absorption corrections were implemented by SADABS-2016/2 (Bruker, 2016/2). An empirical absorption correction was applied. The data were corrected for Lorentz and polarization effects. The structures were solved by direct methods and refined by full-matrix least-squares and difference Fourier techniques, based on  $F^2$ , using ShelXL. All non-hydrogen atoms were refined anisotropically. The hydrogen atoms were positioned geometrically and refined using a riding model. All the hydrogen atoms were included in the final refinement. The final formulas were determined by combining element analyses and XPS. Crystallographic crystal data and structure processing parameters for **C1-C5** are listed in Table S1-S2. Hydrogen bonding geometry, selected bond lengths and bond angles for **C1-C5** are listed in Table S3-S5 of the Supporting Information. Crystallographic data for **C1-C5** have been deposited at the Cambridge Crystallographic Data Centre with CCDC reference numbers CCDC 2031789-2031793.

**Table S1.** Crystal data and structure refinement data of complexes **C1-C5**.

| compound                                             | <b>C1</b>                                              | <b>C2</b>                                                  | <b>C3</b>                                                                             | <b>C4</b>                                                  | <b>C5</b>                                                              |
|------------------------------------------------------|--------------------------------------------------------|------------------------------------------------------------|---------------------------------------------------------------------------------------|------------------------------------------------------------|------------------------------------------------------------------------|
| Formula                                              | C <sub>18</sub> H <sub>15</sub> CuIN <sub>7</sub><br>S | C <sub>16</sub> H <sub>12</sub> BrCu<br>N <sub>6</sub> S   | C <sub>32</sub> H <sub>20</sub> Br <sub>3</sub> Cu <sub>3</sub> N<br>12S <sub>2</sub> | C <sub>16</sub> H <sub>8</sub> ClCu<br>N <sub>6</sub> S    | C <sub>16</sub> H <sub>8</sub> ClCu <sub>0.5</sub><br>N <sub>6</sub> S |
| Fw                                                   | 551.87                                                 | 463.83                                                     | 1067.07                                                                               | 415.33                                                     | 383.56                                                                 |
| Crystal system                                       | Triclinic                                              | Monoclinic                                                 | Monoclinic                                                                            | Triclinic                                                  | Monoclinic                                                             |
| space group                                          | P-1                                                    | P2 <sub>1</sub> /c                                         | C2/c                                                                                  | P-1                                                        | C2/c                                                                   |
| <i>a</i> (Å)                                         | 7.8851(8)                                              | 7.8338(3)                                                  | 14.745(5)                                                                             | 7.9536(13)                                                 | 13.1118(6)                                                             |
| <i>b</i> (Å)                                         | 9.4706(8)                                              | 17.9378(6)                                                 | 11.282(4)                                                                             | 7.9780(17)                                                 | 12.8370(6)                                                             |
| <i>c</i> (Å)                                         | 14.9633(13)                                            | 11.5775(4)                                                 | 21.686(7)                                                                             | 12.239(2)                                                  | 18.0339(8)                                                             |
| $\alpha$ (°)                                         | 92.531(3)                                              | 90.000                                                     | 90                                                                                    | 98.887(8)                                                  | 90.000                                                                 |
| $\beta$ (°)                                          | 102.966(3)                                             | 93.2380(10)                                                | 107.907(12)                                                                           | 99.985(5)                                                  | 102.238(2)                                                             |
| $\gamma$ (°)                                         | 113.898(3)                                             | 90.000                                                     | 90                                                                                    | 94.096(7)                                                  | 90.000                                                                 |
| <i>V</i> (Å <sup>3</sup> )                           | 984.06(16)                                             | 1624.29(10)                                                | 3432.8(19)                                                                            | 751.8(2)                                                   | 2966.4(2)                                                              |
| <i>Z</i>                                             | 2                                                      | 4                                                          | 4                                                                                     | 2                                                          | 8                                                                      |
| <i>D<sub>c</sub></i> (g·cm <sup>-3</sup> )           | 1.862                                                  | 1.897                                                      | 2.065                                                                                 | 1.835                                                      | 1.718                                                                  |
| $\mu$ (mm <sup>-1</sup> )                            | 2.804                                                  | 3.945                                                      | 5.502                                                                                 | 1.781                                                      | 1.107                                                                  |
| 2 $\theta$ range (°)                                 | 5.652 to<br>55.224                                     | 5.682 to<br>55.168                                         | 4.672 to 54.99                                                                        | 5.718 to<br>55.136                                         | 4.492 to<br>64.934                                                     |
| <i>F</i> (000)                                       | 540.0                                                  | 1632                                                       | 2080.0                                                                                | 416.0                                                      | 1548.0                                                                 |
| Data /<br>restraints /<br>parameters                 | 4556/0/254                                             | 3751/0/234                                                 | 3911/0/240                                                                            | 3453/0/229                                                 | 5323/1/231                                                             |
| Reflections<br>collected                             | 15213                                                  | 34292                                                      | 18021                                                                                 | 34289                                                      | 44105                                                                  |
| Goodness of fit<br>on F <sup>2</sup>                 | 1.058                                                  | 1.035                                                      | 1.036                                                                                 | 1.048                                                      | 1.031                                                                  |
| Final R indices<br>[ <i>I</i> > 2sigma ( <i>I</i> )] | R <sub>1</sub> = 0.0250,<br>wR <sub>2</sub> = 0.0567   | R <sub>1</sub> =<br>0.0228,<br>wR <sub>2</sub> =<br>0.0488 | R <sub>1</sub> = 0.0232,<br>wR <sub>2</sub> = 0.0518                                  | R <sub>1</sub> =<br>0.0262,<br>wR <sub>2</sub> =<br>0.0694 | R <sub>1</sub> = 0.0403,<br>wR <sub>2</sub> = 0.0945                   |
| Final R indices<br>[all data]                        | R <sub>1</sub> = 0.0321,<br>wR <sub>2</sub> = 0.0592   | R <sub>1</sub> =<br>0.0334,<br>wR <sub>2</sub> =<br>0.0521 | R <sub>1</sub> = 0.0315,<br>wR <sub>2</sub> = 0.0544                                  | R <sub>1</sub> =<br>0.0299,<br>wR <sub>2</sub> =<br>0.0715 | R <sub>1</sub> = 0.0708,<br>wR <sub>2</sub> = 0.1052                   |

|                                           |           |            |            |            |            |            |
|-------------------------------------------|-----------|------------|------------|------------|------------|------------|
| Largest peak and hole/ $e\text{\AA}^{-3}$ | diff. and | 0.42/-0.81 | 0.32/-0.39 | 0.40/-0.38 | 0.45/-0.32 | 0.51/-0.92 |
|-------------------------------------------|-----------|------------|------------|------------|------------|------------|

**Table S2.** Hydrogen bonding geometry (Å, °) for **C1-C5**.

| <b>C1</b>                   |         |         |            |           |
|-----------------------------|---------|---------|------------|-----------|
| D–H...A                     | D–H     | H...A   | D...A      | <D–H...A  |
| N3–H3...I1                  | 0.86    | 2.75    | 3.6134(19) | 176.8     |
| N5–H5...N2                  | 0.86    | 2.38    | 2.794(3)   | 110.4     |
| C8–H8...N6                  | 0.93    | 2.36    | 2.950(3)   | 121.4     |
| C15–H15...I1 <sup>#2</sup>  | 0.93    | 3.16    | 4.089(2)   | 177.2     |
| C18–H18A...I1 <sup>#3</sup> | 0.96    | 3.18    | 4.039(3)   | 150.4     |
| <b>C2</b>                   |         |         |            |           |
| D–H...A                     | D–H     | H...A   | D...A      | <D–H...A  |
| N5–H5...Br1 <sup>#3</sup>   | 0.75(2) | 2.85(2) | 3.4865(19) | 145(2)    |
| C1–H1...Br1                 | 0.93    | 2.83    | 3.518(2)   | 131.5     |
| C11–H11...Br1 <sup>#4</sup> | 0.93    | 3.13    | 3.9012(19) | 141.6     |
| C16–H16...Br1 <sup>#2</sup> | 0.93    | 2.77    | 3.452(2)   | 130.9     |
| C16–H16...N1 <sup>#4</sup>  | 0.93    | 2.68    | 3.378(3)   | 132.9     |
| <b>C3</b>                   |         |         |            |           |
| D–H...A                     | D–H     | H...A   | D...A      | <D–H...A  |
| N5–H5...Br2 <sup>#1</sup>   | 0.79(3) | 2.93(3) | 3.533(2)   | 136(2)    |
| C1–H1...Br1 <sup>#3</sup>   | 0.93    | 3.05    | 3.769(3)   | 135.2     |
| C2–H2...Br1 <sup>#4</sup>   | 0.93    | 3.13    | 3.829(3)   | 133.7     |
| C4–H4...Br2                 | 0.93    | 3.08    | 3.548(2)   | 113.3     |
| C13–H13...Br1 <sup>#3</sup> | 0.93    | 2.99    | 3.581(3)   | 123.1     |
| C16–H16...Br1 <sup>#1</sup> | 0.93    | 3.02    | 3.663(3)   | 127.4     |
| <b>C4</b>                   |         |         |            |           |
| D–H...A                     | D–H     | H...A   | D...A      | <D–H...A  |
| C16–H16...Cl1 <sup>#3</sup> | 0.93    | 2.89    | 3.631(2)   | 138.0     |
| C4–H4...N1 <sup>#1</sup>    | 0.93    | 2.57    | 3.442(2)   | 156.6     |
| C13–H13...N5 <sup>#4</sup>  | 0.93    | 2.59    | 3.422(3)   | 149.0     |
| <b>C5</b>                   |         |         |            |           |
| D–H...A                     | D–H     | H...A   | D...A      | <D–H...A  |
| C4–H4...N1 <sup>#1</sup>    | 0.93    | 2.66    | 3.584(2)   | 169.9     |
| C13–H13...Cl1 <sup>#2</sup> | 0.93    | 2.88    | 3.712(19)  | 150.0     |
| C1–H1...Cl1 <sup>#3</sup>   | 0.95(2) | 2.73(2) | 3.461(17)  | 134.1(17) |
| C16–H16...Cl1 <sup>#3</sup> | 0.88(3) | 2.91(3) | 3.601(2)   | 137(2)    |

Symmetry codes:

**C1:** #1 = 2-x, 2-y, 2-z; #2 = x-1, y, z-1, z-1/2; #3 = -x+2, -y+1, -z+2;**C2:** #1 = 2-x, 1-y, 2-z; #2 = 1-x, 1-y, 1-z; #3 = x-1, y, z-1; #4 = x, y, z-1;**C3:** #1 = 3/2-x, 3/2-y, 1-z; #2 = 1-x, +y, 1/2-z; #3 = -x+1, -y+1, -z+1, #4 = x-1/2, y+1/2, z;**C4:** #1 = 1-x, -y, 1-z; #2 = 2-x, 1-y, 2-z; #3 = -x+1, -y+1, -z+1; #4 = -x+2, -y+2, -z+1;**C5:** #1 = -x+1/2, -y+3/2, -z+1; #2 = x+1/2, -y+3/2, z-1/2; #3 = -x+1, -y+1, -z+1;

**Table S3.** Selected Bond Lengths (Å) for **C1 – C5**.

| <b>C1</b>             |            |        |            |        |            |
|-----------------------|------------|--------|------------|--------|------------|
| I1–Cu1                | 2.6081(5)  | Cu1–N7 | 2.036(2)   | N4–C5  | 1.346(3)   |
| I1–Cu1 <sup>#1</sup>  | 2.7102(4)  | S1–N2  | 1.6150(19) | N5–C9  | 1.379(3)   |
| N1–S1                 | 1.611(2)   | C1–N4  | 1.347(3)   | N5–C12 | 1.392(3)   |
| N1–C11                | 1.347(3)   | N2–C10 | 1.343(3)   | N6–C12 | 1.332(3)   |
| Cu1–Cu1 <sup>#1</sup> | 2.9964(7)  | N3–C5  | 1.364(3)   | N6–C16 | 1.351(3)   |
| Cu1–N4                | 2.0791(19) | N3–C6  | 1.412(3)   | N7–C17 | 1.124(3)   |
| <b>C2</b>             |            |        |            |        |            |
| Br1–Cu1               | 2.6091(3)  | N1–C8  | 1.349(2)   | N5–C10 | 1.387(2)   |
| Br1–Cu1 <sup>#1</sup> | 2.6561(3)  | N2–C9  | 1.344(2)   | N5–C12 | 1.393(2)   |
| Cu1–N4                | 2.0069(16) | N3–C5  | 1.370(3)   | N6–C12 | 1.342(2)   |
| Cu1–N6 <sup>#2</sup>  | 2.0128(15) | N3–C7  | 1.410(2)   | N6–C16 | 1.348(2)   |
| S1–N1                 | 1.6123(18) | N4–C1  | 1.349(3)   |        |            |
| S1–N2                 | 1.6191(17) | N4–C5  | 1.348(2)   |        |            |
| <b>C3</b>             |            |        |            |        |            |
| Br1–Cu1               | 2.4764(8)  | S1–N2  | 1.626(2)   | N4–C1  | 1.379(3)   |
| Br1–Cu2               | 2.4253(6)  | N1–C8  | 1.345(3)   | N4–C5  | 1.399(3)   |
| Br2–Cu2               | 2.3682(9)  | N2–C9  | 1.341(3)   | N4–C6  | 1.385(3)   |
| Cu1–Cu2               | 2.7964(8)  | N3–C5  | 1.346(3)   | N5–C10 | 1.388(3)   |
| Cu1–N3                | 1.9609(18) | N3–C7  | 1.385(3)   | N5–C12 | 1.404(3)   |
| Cu1–N6 <sup>#1</sup>  | 2.0078(18) | N6–C12 | 1.345(3)   |        |            |
| S1–N1                 | 1.625(2)   | N6–C16 | 1.350(3)   |        |            |
| <b>C4</b>             |            |        |            |        |            |
| Cu1–N3 <sup>#1</sup>  | 1.8765(13) | N4–C6  | 1.401(2)   | N3–C5  | 1.339(2)   |
| Cu1–N3                | 1.8765(13) | N4–C1  | 1.386(2)   | N5–C10 | 1.363(2)   |
| Cu2–Cl1 <sup>#2</sup> | 2.1134(7)  | N6–C11 | 1.3948(19) | N5–C12 | 1.327(2)   |
| Cu2–Cl1               | 2.1134(7)  | N6–C12 | 1.412(2)   | N1–C8  | 1.341(2)   |
| S1–N1                 | 1.6328(16) | N6–C16 | 1.385(2)   | N2–C9  | 1.343(2)   |
| S1–N2                 | 1.6256(16) | N3–C7  | 1.378(2)   | N4–C5  | 1.4004(19) |
| <b>C5</b>             |            |        |            |        |            |
| Cu1–Cl1               | 2.2813(5)  | N1–C8  | 1.334(2)   | N4–C6  | 1.394(2)   |
| Cu1–Cl1 <sup>#1</sup> | 2.2814(5)  | S1–N2  | 1.6178(16) | N5–C10 | 1.364(2)   |
| Cu1–N3 <sup>#1</sup>  | 1.9593(12) | N2–C9  | 1.339(2)   | N5–C12 | 1.325(2)   |
| Cu1–N3                | 1.9594(12) | N3–C5  | 1.335(2)   | N6–C11 | 1.3944(18) |
| C1–N4                 | 1.380(2)   | N3–C7  | 1.3650(18) | N6–C12 | 1.405(2)   |
| N1–S1                 | 1.6251(15) | N4–C5  | 1.3981(18) | N6–C16 | 1.376(2)   |

Symmetry codes:

**C1:** #1 = 2-x, 2-y, 2-z; #2 = x-1, y, z-1, z-1/2; #3 = -x+2, -y+1, -z+2;**C2:** #1 = 2-x, 1-y, 2-z; #2 = 1-x, 1-y, 1-z; #3 = x-1, y, z-1; #4 = x, y, z-1;**C3:** #1 = 3/2-x, 3/2-y, 1-z; #2 = 1-x, +y, 1/2-z; #3 = -x+1, -y+1, -z+1, #4 = x-1/2, y+1/2, z;**C4:** #1 = 1-x, -y, 1-z; #2 = 2-x, 1-y, 2-z; #3 = -x+1, -y+1, -z+1; #4 = -x+2, -y+2, -z+1;

**C5:** #1 = -x+1/2, -y+3/2, -z+1; #2 = x+1/2, -y+3/2, z-1/2; #3 = -x+1, -y+1, -z+1;

**Table S4.** Selected Bond Angles (degree) for **C1 – C5**.

| <b>C1</b>                                |             |                                         |             |
|------------------------------------------|-------------|-----------------------------------------|-------------|
| Cu1–I1–Cu1 <sup>#1</sup>                 | 68.554(13)  | N7–Cu1–I1                               | 111.72(7)   |
| I1–Cu1–I1 <sup>#1</sup>                  | 111.446(13) | N7–Cu1–I1 <sup>#1</sup>                 | 100.53(7)   |
| I1–Cu1–Cu1 <sup>#1</sup>                 | 57.337(12)  | N7–Cu1–Cu1 <sup>#1</sup>                | 119.17(6)   |
| I1 <sup>#1</sup> –Cu1–Cu1 <sup>#1</sup>  | 54.109(12)  | N7–Cu1–N4                               | 105.61(8)   |
| N4–Cu1–I1                                | 120.57(5)   | C5–N3–C6                                | 125.70(19)  |
| N4–Cu1–I1 <sup>#1</sup>                  | 104.90(5)   | C9–N5–C12                               | 130.83(19)  |
| N4–Cu1–Cu1 <sup>#1</sup>                 | 132.47(5)   |                                         |             |
| <b>C2</b>                                |             |                                         |             |
| Cu1–Br1–Cu1 <sup>#1</sup>                | 76.886(11)  | N6 <sup>#2</sup> –Cu1–Br1               | 101.45(5)   |
| Br1–Cu1–Br1 <sup>#1</sup>                | 103.116(11) | N6 <sup>#2</sup> –Cu1–Br1 <sup>#1</sup> | 96.29(5)    |
| N4–Cu1–Br1 <sup>#1</sup>                 | 100.03(5)   | C5–N3–C7                                | 128.02(18)  |
| N4–Cu1–Br1                               | 101.74(5)   | C10–N5–C12                              | 125.14(18)  |
| N4–Cu1–N6 <sup>#2</sup>                  | 147.68(7)   |                                         |             |
| <b>C3</b>                                |             |                                         |             |
| Cu2–Br1–Cu1                              | 69.56(2)    | Br1 <sup>#2</sup> –Cu2–Cu1              | 160.160(17) |
| Br1–Cu1–Cu2                              | 54.360(12)  | Br2–Cu2–Br1 <sup>#2</sup>               | 125.858(15) |
| N3–Cu1–Br1                               | 117.42(5)   | Br2–Cu2–Br1                             | 125.857(15) |
| N3–Cu1–Cu2                               | 124.30(6)   | Br2–Cu2–Cu1 <sup>#2</sup>               | 70.937(13)  |
| N3–Cu1–N6 <sup>#1</sup>                  | 133.22(7)   | Br2–Cu2–Cu1                             | 70.937(13)  |
| N6 <sup>#1</sup> –Cu1–Br1                | 107.30(5)   | Cu1 <sup>#2</sup> –Cu2–Cu1              | 141.87(3)   |
| N6 <sup>#1</sup> –Cu1–Cu2                | 92.19(6)    | C5–N3–Cu1                               | 127.03(15)  |
| Br1 <sup>#2</sup> –Cu2–Br1               | 108.29(3)   | C5–N3–C7                                | 105.13(17)  |
| Br1–Cu2–Cu1 <sup>#2</sup>                | 160.161(17) | C7–N3–Cu1                               | 125.91(14)  |
| Br1–Cu2–Cu1                              | 56.08(2)    | C10–N5–C12                              | 123.8(2)    |
| Br1 <sup>#2</sup> –Cu2–Cu1 <sup>#2</sup> | 56.08(2)    |                                         |             |
| <b>C4</b>                                |             |                                         |             |
| N3 <sup>#1</sup> –Cu1–N3                 | 180         | C16–N6–C11                              | 133.48(15)  |
| Cl1 <sup>#2</sup> –Cu2–Cl1               | 180         | C16–N6–C12                              | 120.26(14)  |
| C5–N4–C6                                 | 107.27(12)  | C7–N3–Cu1                               | 124.85(11)  |
| C1–N4–C5                                 | 119.70(14)  | C5–N3–Cu1                               | 128.80(11)  |
| C1–N4–C6                                 | 132.88(14)  | C5–N3–C7                                | 105.70(13)  |
| C11–N6–C12                               | 106.10(13)  | C12–N5–C10                              | 104.59(14)  |
| <b>C5</b>                                |             |                                         |             |
| Cl1–Cu1–Cl1 <sup>#1</sup>                | 180         | C1–N4–C5                                | 118.61(14)  |
| N3 <sup>#1</sup> –Cu1–Cl1                | 89.78(4)    | C1–N4–C6                                | 134.27(13)  |
| N3 <sup>#1</sup> –Cu1–Cl1 <sup>#1</sup>  | 90.22(4)    | C6–N4–C5                                | 107.12(12)  |
| N3–Cu1–Cl1 <sup>#1</sup>                 | 89.78(4)    | C12–N5–C10                              | 104.48(14)  |
| N3–Cu1–Cl1                               | 90.22(4)    | C11–N6–C12                              | 106.03(14)  |
| N3 <sup>#1</sup> –Cu1–N3                 | 180.00(6)   | C16–N6–C11                              | 133.64(15)  |



|           |            |            |            |
|-----------|------------|------------|------------|
| C5–N3–Cu1 | 125.56(10) | C16–N6–C12 | 120.33(15) |
| C5–N3–C7  | 106.21(13) | C7–N3–Cu1  | 128.15(11) |

Symmetry codes:

**C1:** #1 = 2-x, 2-y, 2-z; #2 = x-1, y, z-1, z-1/2; #3 = -x+2, -y+1, -z+2;

**C2:** #1 = 2-x, 1-y, 2-z; #2 = 1-x, 1-y, 1-z; #3 = x-1, y, z-1; #4 = x, y, z-1;

**C3:** #1 = 3/2-x, 3/2-y, 1-z; #2 = 1-x, +y, 1/2-z; #3 = -x+1, -y+1, -z+1, #4 = x-1/2, y+1/2, z;

**C4:** #1 = 1-x, -y, 1-z; #2 = 2-x, 1-y, 2-z; #3 = -x+1, -y+1, -z+1; #4 = -x+2, -y+2, -z+1;

**C5:** #1 = -x+1/2, -y+3/2, -z+1; #2 = x+1/2, -y+3/2, z-1/2; #3 = -x+1, -y+1, -z+1;

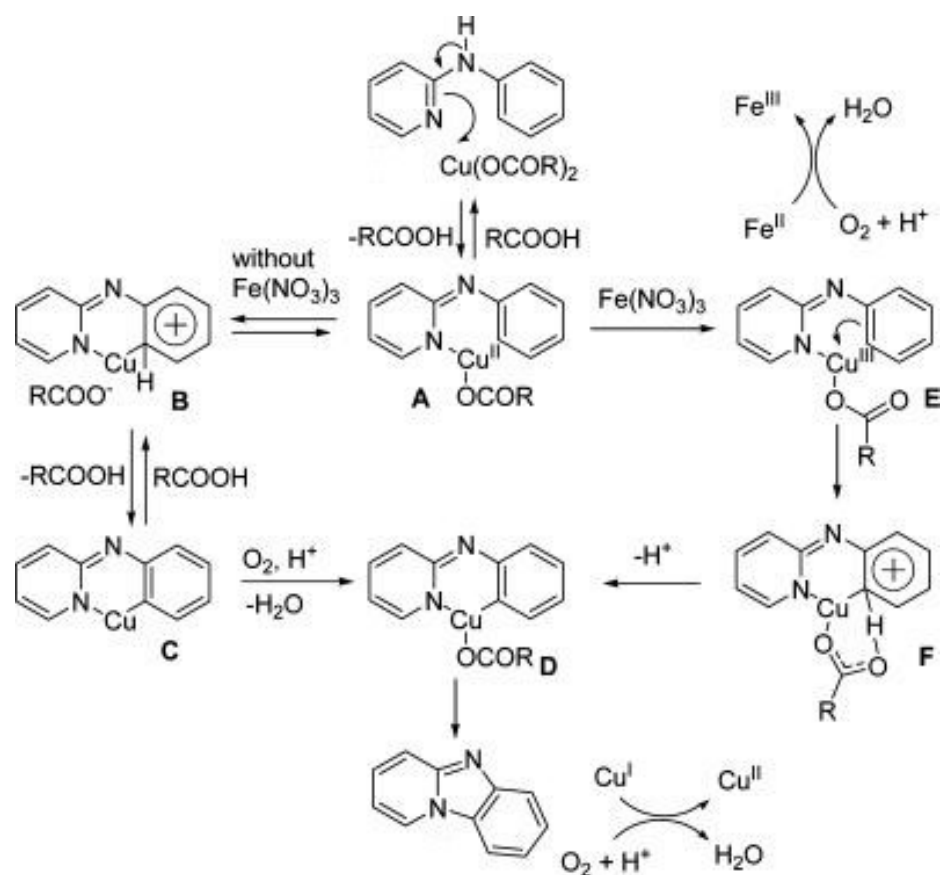

**Scheme S1.** Proposed mechanism for the intramolecular C–H amination with and without iron salt reported by Zhu and co-workers<sup>2</sup>.

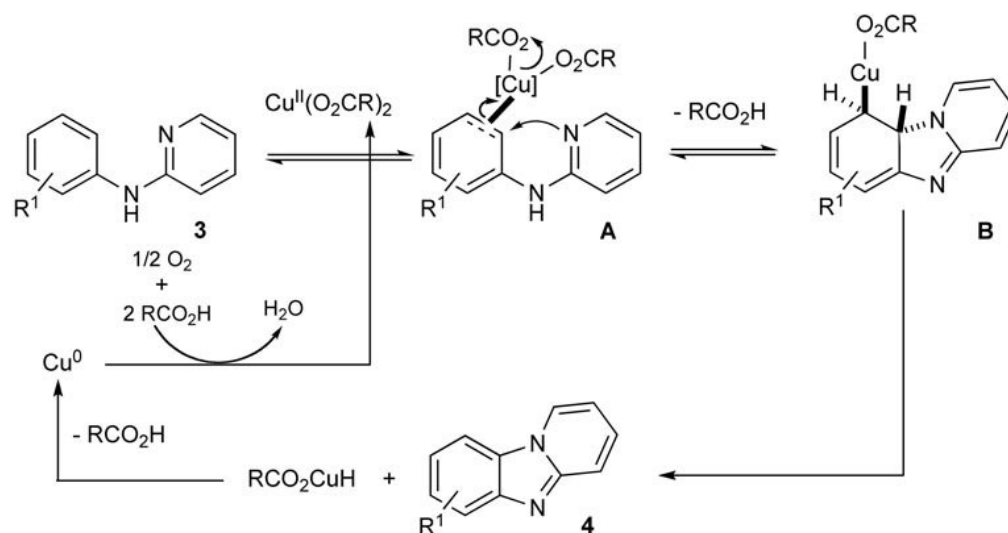

**Scheme S2.** Proposed mechanism for the intramolecular C–H amination reported by Maes and co-workers<sup>3</sup>.

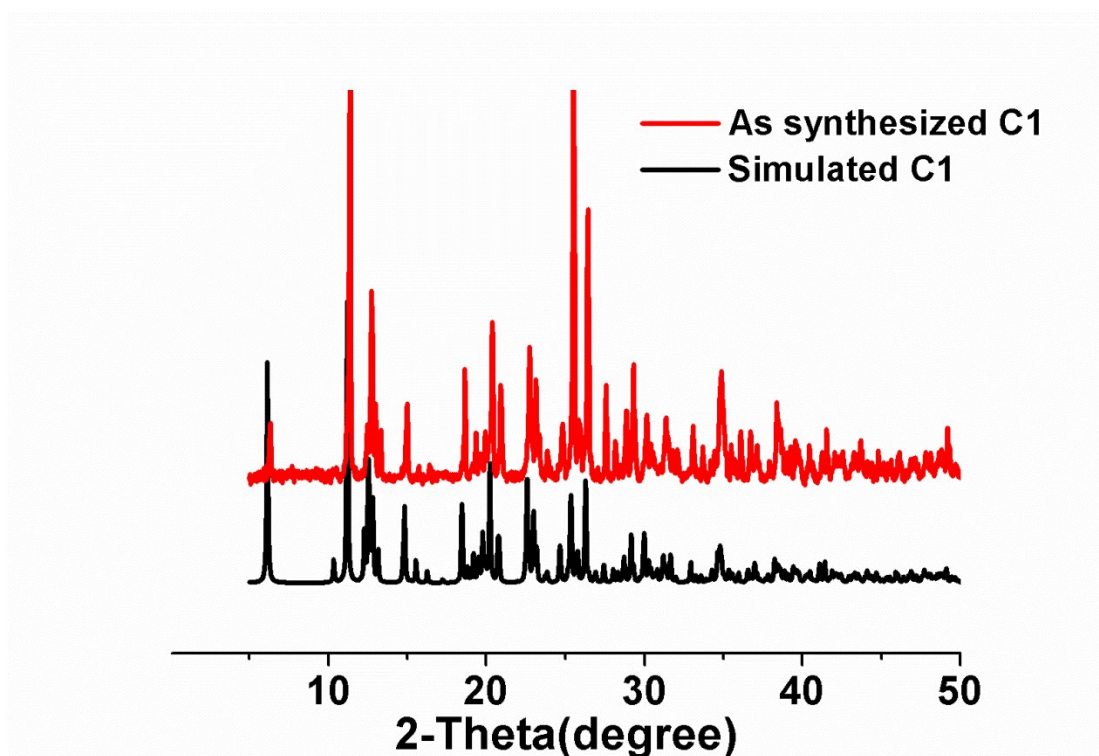

**Figure S1.** The simulated (black) and experimental (red) PXR D patterns for complex C1.

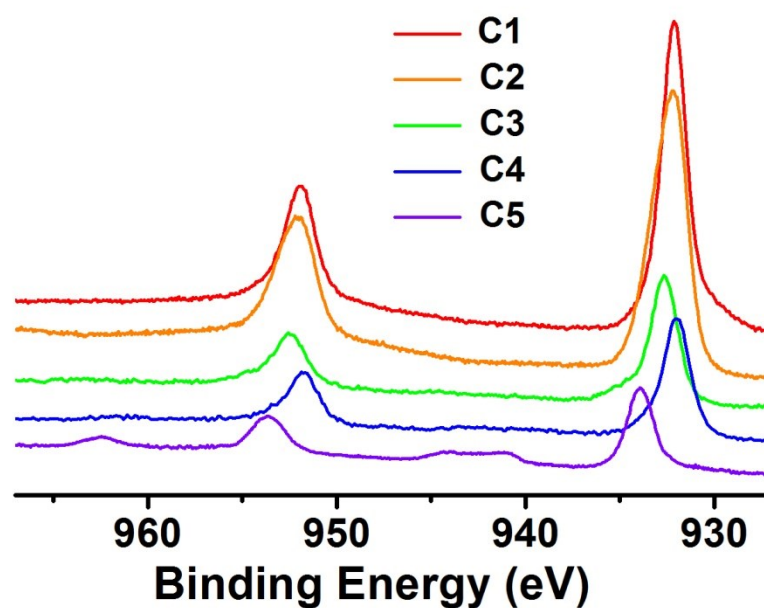

**Figure S2.** X-ray photoelectron spectra (XPS) of complexes C1 (red), C2 (orange), C3 (green), C4 (blue) and C5 (violet) recorded in the Cu 2p region.

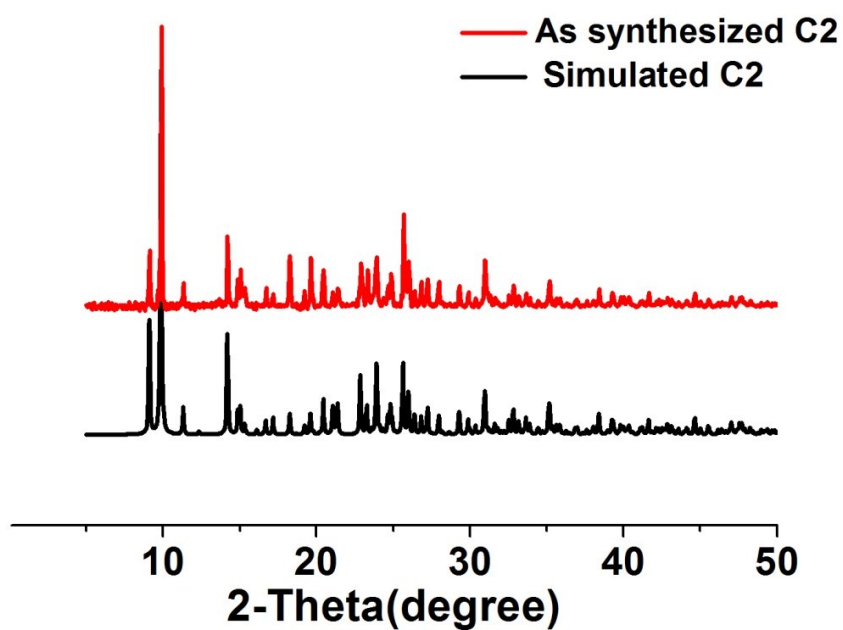

**Figure S3.** The simulated (black) and experimental (red) PXRD patterns for complex C2.

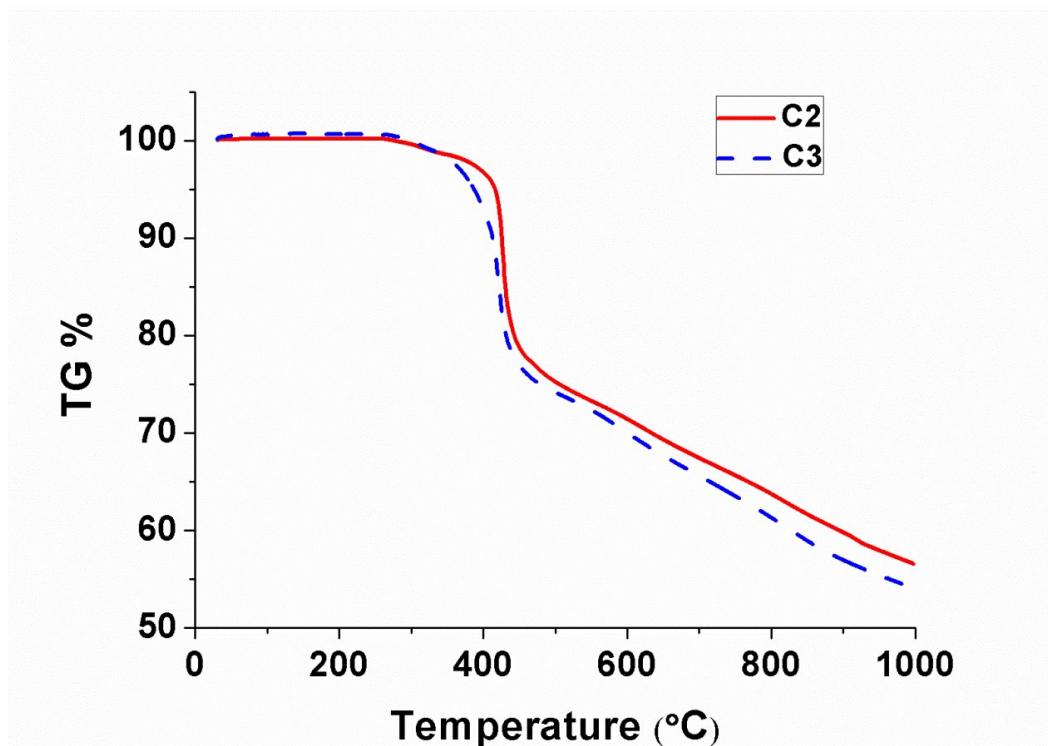

**Figure S4.** TGA curves of C2 (red solid line) and C3 (blue dot line).

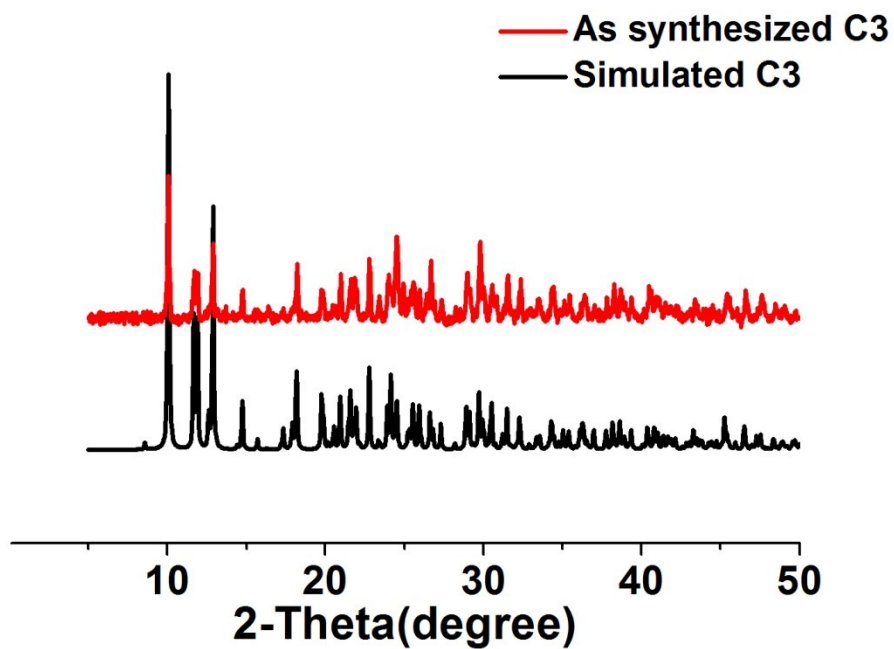

**Figure S5.** The simulated (black) and experimental (red) PXRD patterns for complex C3.

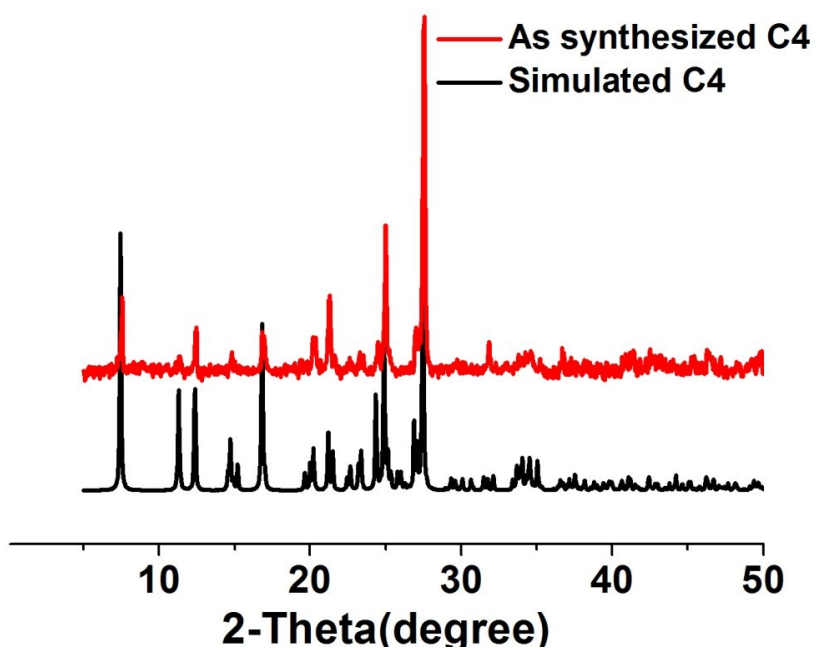

**Figure S6.** The simulated (black) and experimental (red) PXRD patterns for complex C4.

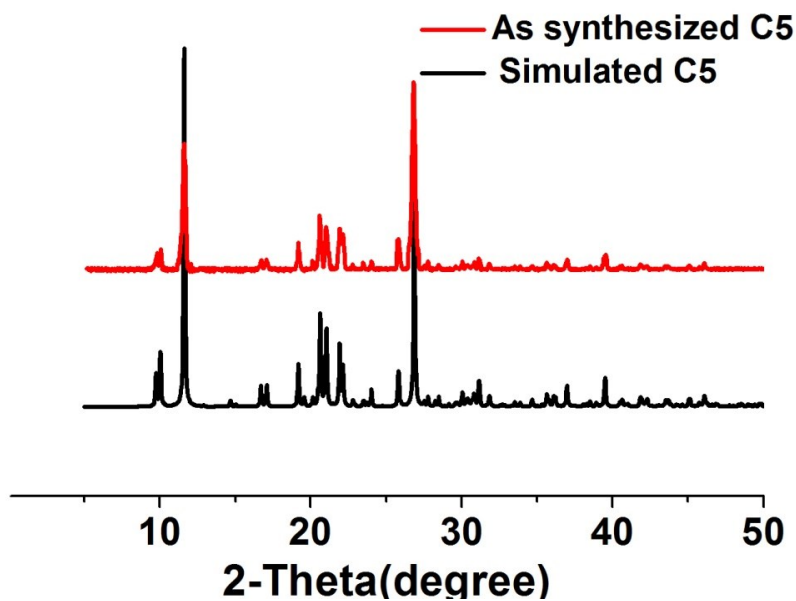

**Figure S7.** The simulated (black) and experimental (red) PXRD patterns for complex C5.

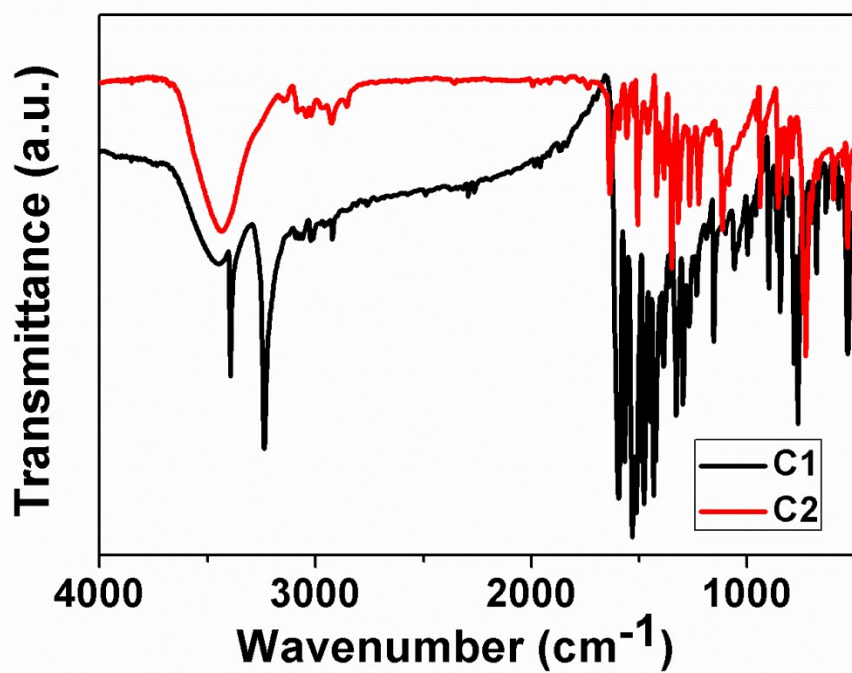

Figure S10. IR spectra for complexes C1 (black), C2 (red).

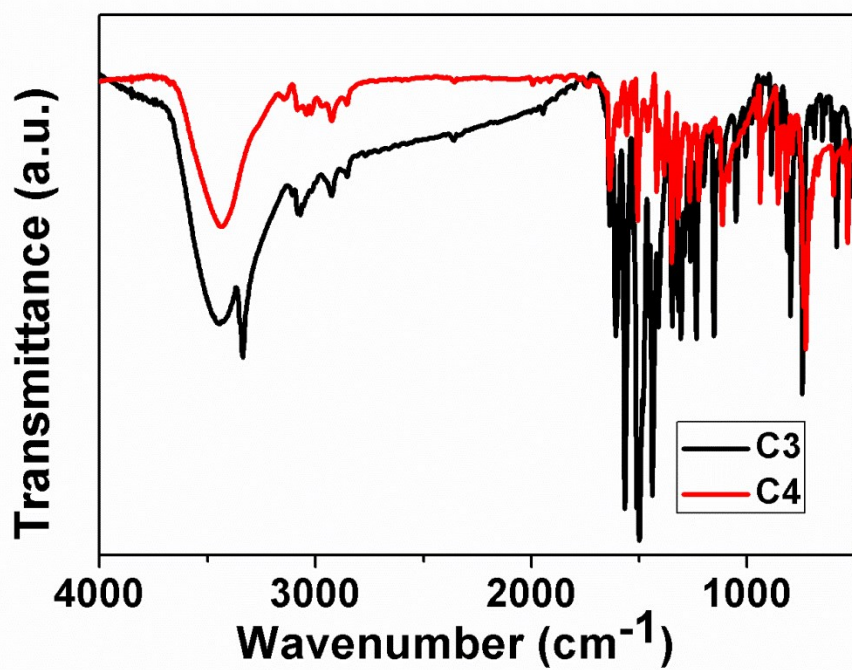

Figure S11. IR spectra for complexes C3 (black), C4 (red).

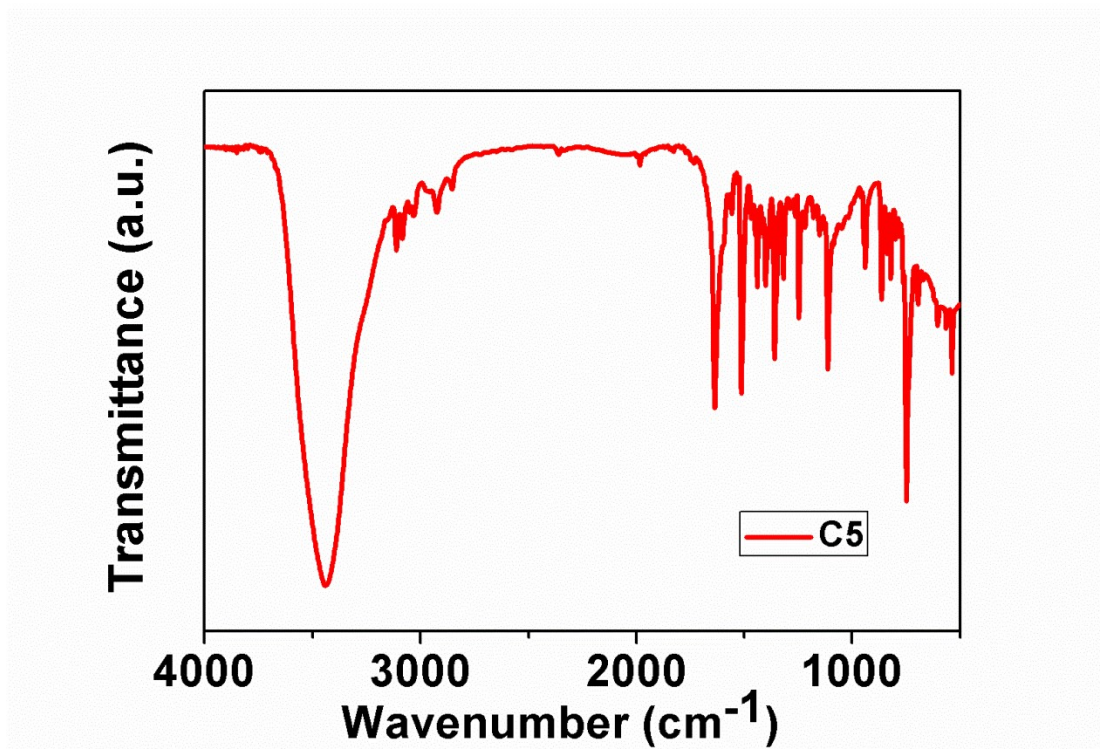

Figure S12. IR spectra for complexes C5 (red).

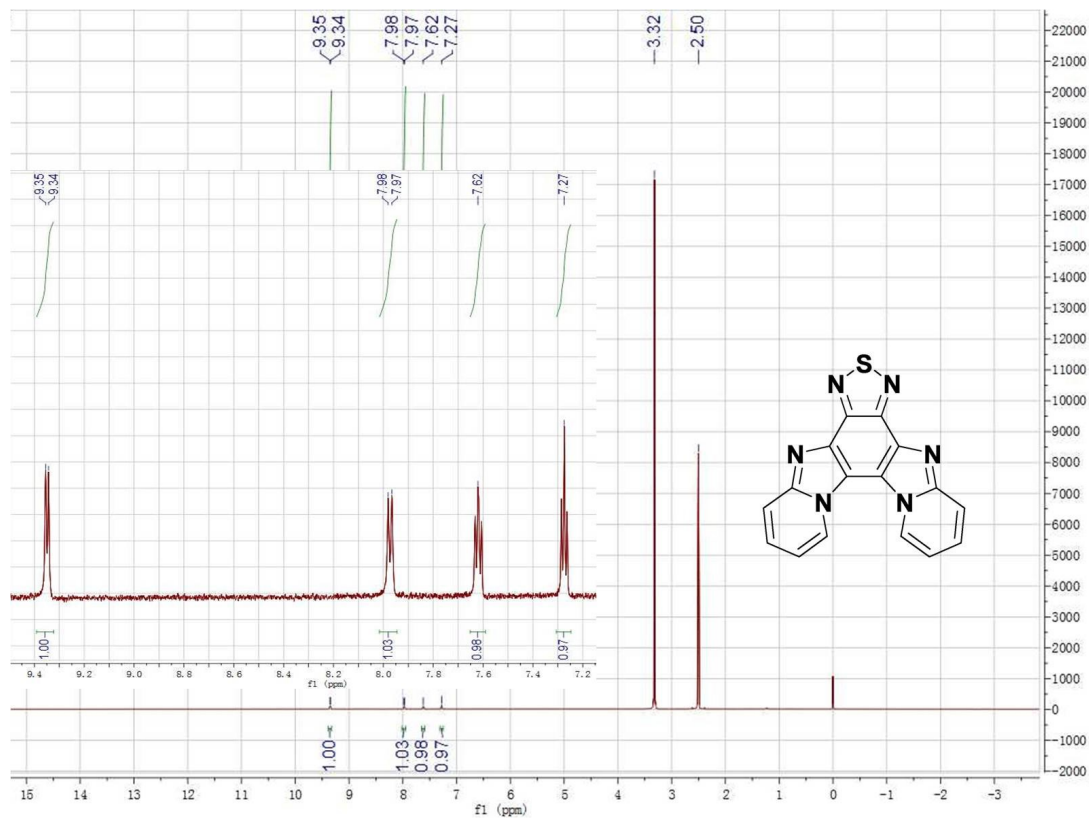

Figure S13. <sup>1</sup>H-NMR spectrum of L3.
